# Supplementary material for: Syntheses of high molecular weight hydroxy functional copolymers by green and selective polycondensation methods
Source: Royal Society of Chemistry journal article supplement (doi:10.1039/d0ra00120a), 2020-01-01
Supplement: d0ra00120a1.pdf [file d0ra00120a1.pdf]

## Supporting Information

### **Syntheses of High Molecular Weight Hydroxy Functional Copolymers by Green and Selective Polycondensation Methods**

Xin Yang <sup>a</sup>, Dexing Li <sup>a</sup>, Chenggang Song <sup>a</sup>, Peiyuan Shao <sup>a</sup>, Shiming Wang <sup>a</sup>, Ziqing Wang <sup>a</sup>,  
Yin Lv <sup>a,b\*</sup>, Zhong Wei <sup>a,b\*</sup>

<sup>a</sup> School of Chemistry and Chemical Engineering, Shihezi University, Shihezi 832003, China

<sup>b</sup> Key Laboratory for Green Processing of Chemical Engineering of Xinjiang Bingtuan, Shihezi University, Shihezi 832003, China

\*Correspondence to: Prof. Zhong Wei (E-mail: [steven\\_weiz@sina.com](mailto:steven_weiz@sina.com))

Dr. Yin Lv (E-mail: [ag\\_125@163.com](mailto:ag_125@163.com))

## $^1\text{H}$ NMR

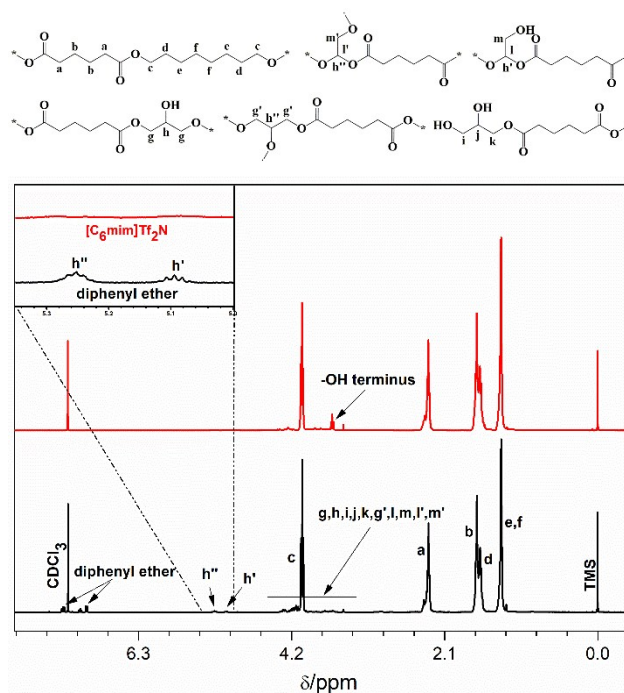

Fig. S1. P(OA-GA) macromolecular structure.  $^1\text{H}$ -NMR spectrum of P(OA-GA) synthesized in [C<sub>6</sub>mim]Tf<sub>2</sub>N and diphenyl ether.

## $^{31}\text{P}$ NMR and Hydroxyl content

$^{31}\text{P}$  NMR spectroscopy was performed on a Bruker 400 MHz spectrometer. The delay time was set at 3 s with the number of recorded scans of 1024. A stock solution was prepared by weighing exactly 530 mg Cr(acac)<sub>3</sub> (30.3 mM) and 150 mg cyclohexanol (30 mM) in a 50mL volumetric flask. These compounds were subsequently dissolved in a mixture of pyridine and CDCl<sub>3</sub>(2.3:1 volume ratio). 4Å molecular sieves were added to protect the stock solution from moisture. Cyclohexanol was used as an internal standard for quantification purposes. Around 45-50mg of the polymer were accurately weighed into a vial, 0.6 mL of stock solution was added and the solution was transferred to a 5 mm NMR tube. Subsequently, 70  $\mu\text{L}$  of phospholane reagent was added and HCl gas was formed, indicating that the

phosphorylation reaction took place. The reaction mixture was left to react for about 30 min at room temperature. Upon completion of the reaction, after the HCl formation had stopped, the solution was used to obtain the  $^{31}\text{P}$  NMR spectra. Chemical shifts are reported in ppm relative to the residual peak of water-derivatized phospholane ( $\delta = 132.2$  ppm).

Data analysis was performed using MestReNova software. Data afforded by the experiments are expressed in mg KOH/g sample.

$$\text{Hydroxyl dgroups} \left( \frac{\text{mg KOH}}{\text{g sample}} \right) = \frac{\text{mg}_{\text{cyclohexanol}} \frac{56100 \text{ mg KOH}}{\text{mol KOH}} \cdot \text{peak area hydroxyl group}}{\text{mg}_{\text{polyester}} \frac{100.2 \text{ g cyclohexanol}}{\text{mol cyclohexanol}} \cdot \text{peak area cyclohexanol}}$$

### $^{31}\text{P}$ NMR

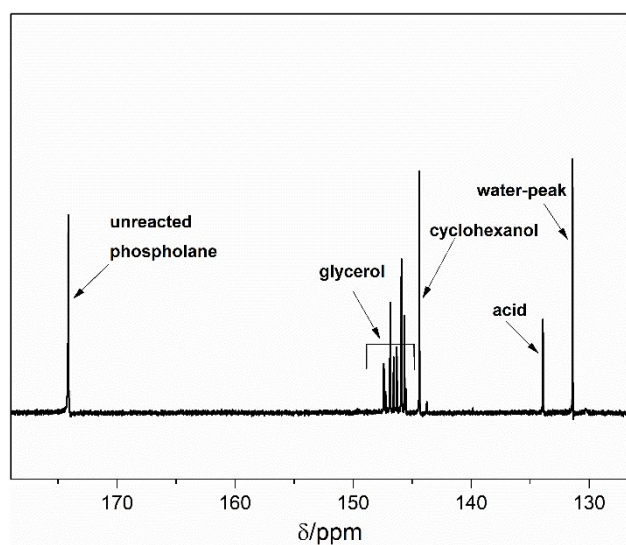

Fig. S2.  $^{31}\text{P}$ -NMR spectrum of P(OA-GA)

## Hydroxyl content

Table S1. Hydroxyl content of P(OA-GA) of different glycerol content.

| Entry | Molar ratio<br>A:O:G <sup>[b]</sup> | Ter <sup>[c]</sup><br>(%) | L <sub>1,2</sub> <sup>[d]</sup><br>(%) | L <sub>1,3</sub> <sup>[e]</sup><br>(%) | Den <sup>[f]</sup><br>(%) | Mn <sup>[g]</sup><br>(g/mol) | PDI <sup>[g]</sup><br>(Mw/Mn) | OHV <sub>NMR</sub> <sup>[h]</sup><br>[mg <sub>KOH</sub> g <sup>-1</sup> ] |
|-------|-------------------------------------|---------------------------|----------------------------------------|----------------------------------------|---------------------------|------------------------------|-------------------------------|---------------------------------------------------------------------------|
| 1     | 1:0.8:0.2                           | 13.78                     | 15.11                                  | 44.44                                  | 26.67                     | 29639                        | 1.21                          | 3259                                                                      |
| 2     | 1:0.84:0.21                         | 20.42                     | 19.58                                  | 40.83                                  | 19.20                     | 34795                        | 1.48                          | 4702                                                                      |
| 3     | 1:0.53:0.53                         | 14.8                      | 18.4                                   | 40.00                                  | 26.80                     | 15158                        | 1.37                          | 5963                                                                      |

[a] All products were synthesized through two-step method. Pre-condensation conditions: adipic acid : 1,8-octanediol : Glycerol = 1:0.84:0.21; 130, 140, 150°C for 1h and 160°C for 2h. Post-polycondensations conditions: 60°C, N-435(10wt% of monomers), reaction times were 24h in vacuum 1.5-3mmHg; [b]A=adipic acid; O=1,8-octanediol; G=Glycerol. Data were analyzed by <sup>13</sup>C NMR and calculated based on [c]eq.2.; [d]eq.3.; [e]eq.4.; [f]eq.5. [g] Determined by GPC measurement in THF relative to poly(styrene). n.d.=not determined. [h] Determined by <sup>31</sup>P NMR.

## Comparisons of different polymerization methods

Table S2. The comparisons of different polymerization methods

| Method | Temperature<br>(°C) | Catalyst                       | Mn(g/mol) | Mw(g/mol) | PDI(Mw/Mn) | References |
|--------|---------------------|--------------------------------|-----------|-----------|------------|------------|
| 1      | 60                  | N-435(10wt%)                   | 53937     | 96547     | 1.79       | This work  |
| 2      | 60                  | Sc(OTf) <sub>3</sub> (0.5mol%) | 18600     | 44268     | 2.38       | 4          |
| 3      | 70                  | N-435(10wt%)                   | 24387     | 75599     | 3.1        | 28         |
| 4      | 90                  | N-435(10wt%)                   | 9120      | 30096     | 3.3        | 8          |
| 5      | 60                  | N-435(10wt%)                   | 8900      | 31150     | 3.5        | 11         |

Method 1. Adipic acid: 1,8-octanediol: Glycerol(mol)=1:0.84:0.21, in solvent (diphenyl ether), under reduced pressure (1.5-3mm Hg), 24h.

Method 2. Dicarboxylic Acid: Glycerol: 1,9-nonanediol(mol)=1:0.8:0.2, bulk, under reduced pressure (0.3-3.0mmHg), 10h.

Method 3. Adipic acid: 1,8-octanediol: Glycerol(mol)=1:0.8:0.2, bulk, under reduced pressure (40 mmHg), 42h.

Method 4. Oleic diacid: Glycerol =1:1(mol), bulk, under reduced pressure (10 mmHg), 24h.

Method 5. Divinyl adipate: Glycerol=1:1(mol), in solvent (THF), normal pressure, 24h.

## Repeatability of synthetic methods

Table S3. The proportion of glycerol repeat unit substitution of copolymer P (OA-GA) [a]

| Entry | Molar ratio<br>A : O : G <sup>[b]</sup> | Solvent                               | Ter <sup>[c]</sup><br>(%) | L <sub>1,2</sub> <sup>[d]</sup><br>(%) | L <sub>1,3</sub> <sup>[e]</sup><br>(%) | Den <sup>[f]</sup><br>(%) | Mn <sup>[g]</sup><br>(g/mol) | PDI <sup>[g]</sup><br>(Mw/Mn) |
|-------|-----------------------------------------|---------------------------------------|---------------------------|----------------------------------------|----------------------------------------|---------------------------|------------------------------|-------------------------------|
| M5-1  | 1:0.84:0.21                             | diphenyl ether                        | 12.89                     | 15.11                                  | 44.44                                  | 27.56                     | 53937                        | 1.79                          |
| M5-2  | 1:0.84:0.21                             | diphenyl ether                        | 13.46                     | 17.32                                  | 45.92                                  | 23.30                     | 52074                        | 1.69                          |
| M8-1  | 1:0.84:0.21                             | [C <sub>6</sub> mim]Tf <sub>2</sub> N | 20.42                     | 19.58                                  | 40.83                                  | 19.20                     | 13913                        | 1.73                          |
| M8-2  | 1:0.84:0.21                             | [C <sub>6</sub> mim]Tf <sub>2</sub> N | 19.81                     | 20.05                                  | 41.33                                  | 18.81                     | 12835                        | 1.47                          |

[a] All products were synthesized through two-step method; Pre-polymerization were conducted at 130, 140, 150°C for 1h and 160°C for 2h under N<sub>2</sub> atmosphere, respectively; Post-polymerization were conducted at 60°C, 24h, N-435(10wt% of monomers), in vacuum 1.5-3mmHg; [b]A=adipic acid; O=1,8-octanediol; G=Glycerol. Data were analyzed by <sup>13</sup>C NMR and calculated based on [c] eq.2; [d] eq.3; [e] eq.4; [f] eq.5; [g] Determined by GPC measurement in THF.
